# Supplementary material
Source: Springer Nature journal article supplement (https://www.springermedizin.de/resource/supplementary/12992_2013_246_MOESM2_ESM.docx/9616206)
Supplement: MOESM2 [file 9616206]

Notes:

- PoC: People of Concern.
- Not including all urban refugee populations in developing countries or in the country specified.
- Refers to cities/urban areas for which data for total PoC and refugees in urban areas in 2011 are available.
- Data from UNHCR Public Health, Nutrition, HIV and WASH Global Fact Sheets, 2011.
